# Supplementary material for: Understanding the motivation and performance of community health volunteers involved in the delivery of health programmes in Kampala, Uganda: a realist evaluation
Source: HighWire-hosted journal article supplement (doi:10.1136/bmjopen-2015-008614), 2015-11-01

**Annexe 1: Overview of the organisational context of URCS (profile of volunteers, URCS prestige, mission, goals, value and structure)**

## Profile of URCS volunteers

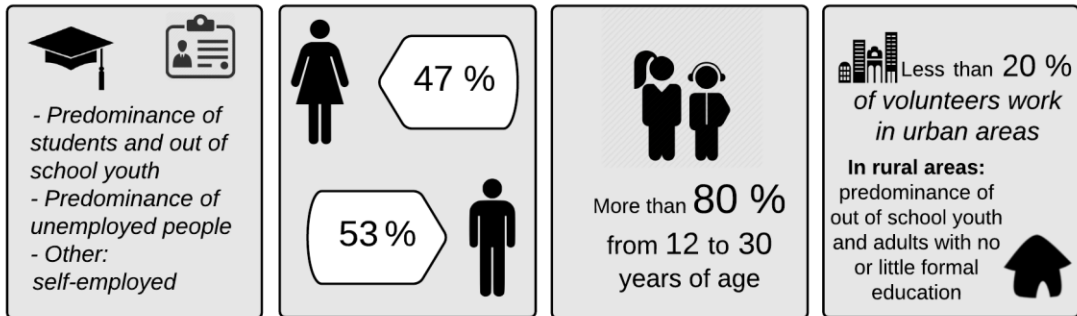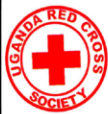

URCS voted by the people of Uganda as the best humanitarian agency of the year 2013

## URCS: vision, mission, goals, values

**THE VISION:** An empowered, healthy and self-sustaining community that responds to the needs of its most vulnerable.

**THE MISSION:** To be a leading humanitarian agency in Uganda in saving lives, supporting livelihoods and promoting human dignity.

### MAIN GOALS:

- To assist the sick and wounded in time of war and to non-belligerents and to prisoners of war and civilians suffering from effects of war.
- The improvement of health, prevention of disease and mitigation of suffering throughout the world without any distinction based on race, nationality, class, religion or political opinions.
- Being the lead agency in Disaster Management.

In execution of its goal and objectives, the URCS is guided by the seven fundamental Principles of the movement i.e. humanity, impartiality, neutrality, independence, voluntary service, unity and universality.

### CORE VALUES:

- Open mindedness: we are a learning organization, we have perception, flexibility and we do listen to the community. We are responsive to internal and external environment.
- Responsive: We provide attention to the vulnerable people; we respond to the assessed needs as per our commitment and mandate.
- Integrity / Transparency / Stewardship: Our acts conform with that we say and with ethical behaviour and generally accepted standards of effectiveness. We responsibly utilize available resources, according to what we plan and claim to deliver and openly share the information with relevant stakeholders.
- Responsible: We react to emergencies in a timely and valuable way.
- Democracy: We believe in equal distribution of power at all levels.
- Value for people: We accord essence to humanity, value human life without discrimination, this is a guide factor to all our interventions.
- Equity/Equality: Our resource allocation system considers the vulnerable and promotes fairness to all.
- Respect for gender and other forms of diversity.
- Identity.

## The URCS structure

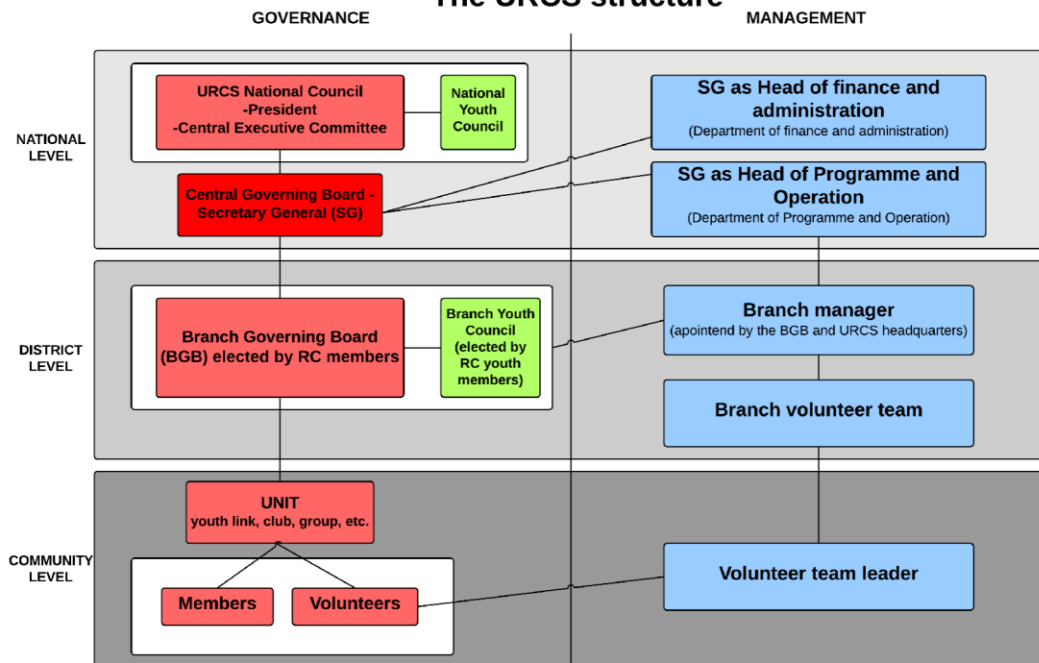

Supplement: bmjopen-2015-008614supp1.pdf [file bmjopen-2015-008614supp1.pdf]
